# Supplementary material
Source: publisher figshare collection journal article supplement (https://frontiersin.figshare.com/ndownloader/files/28113186)
Supplement: Supplementary file [file 28113186]

## *Supplementary Material*

**Supplemental table 1**

| Test                       | Patient #1                                                                       | Patient #2                                                                      | Reference   |
|----------------------------|----------------------------------------------------------------------------------|---------------------------------------------------------------------------------|-------------|
| Umbilical serum TSH (mU/l) | 11                                                                               | 6.6                                                                             | < 40        |
| Total Cholesterol (mmol/l) | 5.0                                                                              | 4.5                                                                             | 2.7 - 5.8   |
| HDL-Cholesterol (mmol/l)   | 1.71                                                                             | 1.23                                                                            | 0.93 - 1.94 |
| LDL-Cholesterol (mmol/l)   | 3.4                                                                              | 3.2                                                                             | 1.6 - 3.6   |
| Triglycerides (mmol/l)     | 0.6                                                                              | 0.8                                                                             | < 1         |
| Glucose (mmol/l)           | 4.4                                                                              | 5.0                                                                             | 4 - 6       |
| HbA1c (mmol/mol)           | 33                                                                               | 35                                                                              | 20 - 42     |
| Insulin (mU/l)             | 5                                                                                | 6                                                                               | 2.6 - 25    |
| IGF1 (nmol/l)              | 27                                                                               | 23                                                                              | 5 - 44      |
| Cortisol (nmol/l)          | 134                                                                              | 167                                                                             | 133 - 537   |
| Bone age                   | 2 – 2.3 years behind                                                             | 0.7 year behind                                                                 |             |
| Head MRI                   | Normal                                                                           | Normal                                                                          |             |
| Thyroid ultrasound         | Normal (Isthmus 1,6 mm,<br>left lobe 22 x 8 x 6 mm,<br>right lobe 24 x 8 x 7 mm) | Normal (Isthmus 0,7 mm,<br>left lobe 25 x 9 x 7mm, right<br>lobe 30 x 9 x 7 mm) |             |

Clinical and biochemical variables and their reference values in two patients with CeH. Patient #1's laboratory tests were performed at the age of 9. Bone age was assessed at the age of 5.7 years. Patients #2's laboratory tests were performed at the age of 6.5 years and his bone age was determined at the age of 6.7 years.

## Supplementary Material

|                          |                                                                       |      |
|--------------------------|-----------------------------------------------------------------------|------|
| WT_IRS4                  | MASCSFTRDQATRRLRGAAAAAALAAVVTPLLSSTPTALIGTGSSCPGAMWLSTAT              | 60   |
| MUT_IRS4 (p.G572W_fs*32) | MASCSFTRDQATRRLRGAAAAAALAAVVTPLLSSTPTALIGTGSSCPGAMWLSTAT<br>*****     | 60   |
| WT_IRS4                  | GSRSDESEEEEDLPVGEVCKRGYLRKQKHGHRRYFVLKLETADAPARLEYENARKFRH            | 120  |
| MUT_IRS4 (p.G572W_fs*32) | GSRSDESEEEEDLPVGEVCKRGYLRKQKHGHRRYFVLKLETADAPARLEYENARKFRH<br>*****   | 120  |
| WT_IRS4                  | SVRAAAAAAASGAAIPLIPPRRVITLYQCFSVSQRADARYRHIALFTQDEYFAMV               | 180  |
| MUT_IRS4 (p.G572W_fs*32) | SVRAAAAAAASGAAIPLIPPRRVITLYQCFSVSQRADARYRHIALFTQDEYFAMV<br>*****      | 180  |
| WT_IRS4                  | AENESEQESWYLLSLRILILESKRRRCGLGAQPDGEPALAAAAAEPFYKDVQVIVK              | 240  |
| MUT_IRS4 (p.G572W_fs*32) | AENESEQESWYLLSLRILILESKRRRCGLGAQPDGEPALAAAAAEPFYKDVQVIVK<br>*****     | 240  |
| WT_IRS4                  | PRGLGHRKELSGVFRCLTDEEVFVRLNTEVASVVVQLLSIRRCGHSEQYFFLEVGRST            | 300  |
| MUT_IRS4 (p.G572W_fs*32) | PRGLGHRKELSGVFRCLTDEEVFVRLNTEVASVVVQLLSIRRCGHSEQYFFLEVGRST<br>*****   | 300  |
| WT_IRS4                  | VIGPGELWMQVDDCVVAQNMHLEFLKMRALCADEYRARCRRSYISIGAHLLTLLSARRH           | 360  |
| MUT_IRS4 (p.G572W_fs*32) | VIGPGELWMQVDDCVVAQNMHLEFLKMRALCADEYRARCRRSYISIGAHLLTLLSARRH<br>*****  | 360  |
| WT_IRS4                  | LGLVPLEPGGWLRRSRFEQFCHLRAIGDGEDEMLFTRRFVTPSEPVASRRGRHLPRGR            | 420  |
| MUT_IRS4 (p.G572W_fs*32) | LGLVPLEPGGWLRRSRFEQFCHLRAIGDGEDEMLFTRRFVTPSEPVASRRGRHLPRGR<br>*****   | 420  |
| WT_IRS4                  | RSRRASVVPASFRRRLAPSPARPRHPAEAPNNGARLSSEVSGSGSGNFGEENPQGGKEDQ          | 480  |
| MUT_IRS4 (p.G572W_fs*32) | RSRRASVVPASFRRRLAPSPARPRHPAEAPNNGARLSSEVSGSGSGNFGEENPQGGKEDQ<br>***** | 480  |
| WT_IRS4                  | EGSGGDYMPMNNWGSNGRSGGGQGSNGQSSSHSGGNQCSGEGQGSRGQGSGNGQGS              | 540  |
| MUT_IRS4 (p.G572W_fs*32) | EGSGGDYMPMNNWGSNGRSGGGQGSNGQSSSHSGGNQCSGEGQGSRGQGSGNGQGS<br>*****     | 540  |
| WT_IRS4                  | GGNQCSRDOGQTAGGHGSGGGQRPGGGHGSGGGQGPGDGHGSGGKNSGGGKSGSGKGS            | 600  |
| MUT_IRS4 (p.G572W_fs*32) | GGNQCSRDOGQTAGGHGSGGGQRPGGGHGSGGWWPGTWRLRWQELWGGQ-----<br>***** * : : | 592  |
| WT_IRS4                  | DGDGERGKSLKRSYFGKLTQSKQQMPPPPPPPPPPAGGTGGKGSGRFRLYFCVD                | 660  |
| MUT_IRS4 (p.G572W_fs*32) | -----RLRKWERIRW*-----<br>* :. : :                                     | 602  |
| WT_IRS4                  | RGATKECKEAKVDAEIEPGAARGPHRARAFDEDEDDPYVPMRPGVATPLVSSSDYMPM            | 720  |
| MUT_IRS4 (p.G572W_fs*32) | -----                                                                 | 602  |
| WT_IRS4                  | APQNVASASKKRHSRSPFEDSRGYMMMFPRVSPPPAPSPPKAPDTNKEDDSKDNDSESDYM         | 780  |
| MUT_IRS4 (p.G572W_fs*32) | -----                                                                 | 602  |
| WT_IRS4                  | FMAPGAGAIKPNRNPQGGSSSKSWSSYFSLPNPFRSSPLGQNDNSEYVPLPGKFLGRG            | 840  |
| MUT_IRS4 (p.G572W_fs*32) | -----                                                                 | 602  |
| WT_IRS4                  | LDKEVSYNWDPKDAASKPSGEGSFSKPGDGGSPSKPSDHEPPKNKAKRPNRLSFITKGYK          | 900  |
| MUT_IRS4 (p.G572W_fs*32) | -----                                                                 | 602  |
| WT_IRS4                  | IKPKPQKPTHEQREADSSSDYVNMDFTKRESNTPAPSTQGLPDSWGI IAEPRQSAFSNYV         | 960  |
| MUT_IRS4 (p.G572W_fs*32) | -----                                                                 | 602  |
| WT_IRS4                  | NVEFGVFFPNPANDLSDLLRAIPRANPLSDSARWPLPPLPLSATGSNAIEEGDYIEVI            | 1020 |
| MUT_IRS4 (p.G572W_fs*32) | -----                                                                 | 602  |

**Supplemental figure 1: Aligned IRS4 wildtype (WT) and mutated (p.G572W\_fs\*32) sequences.**  
The alignment was performed using Clustal O (1.2.4) multiple sequence alignment tool (12).

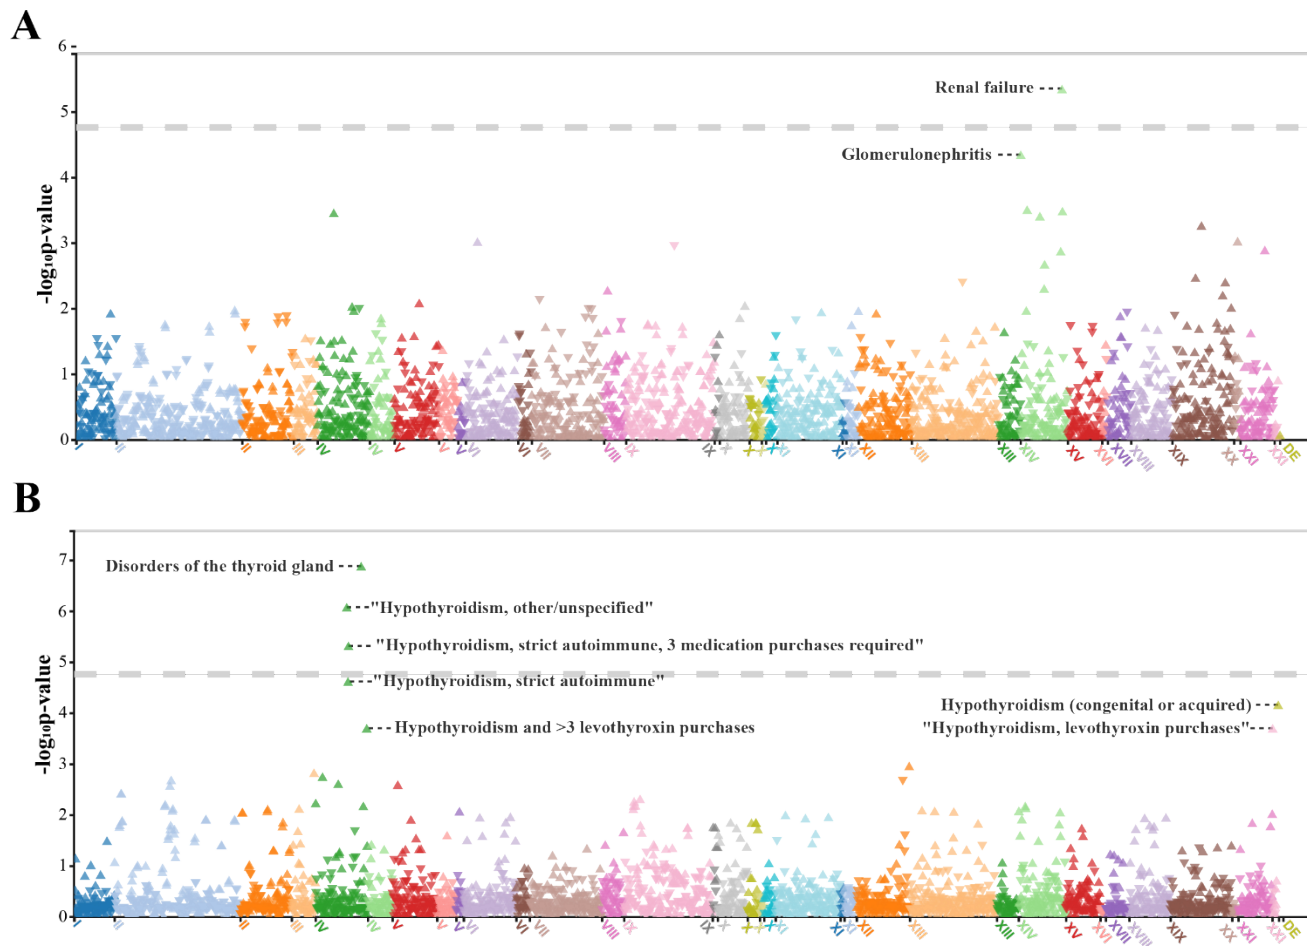

**Supplemental figure 2: PheWeb images of the two IRS4 variants.**

(A) rs1801164 showing significant association with renal failure and (B) rs1452561670, 20 kb downstream of IRS4 associated significantly with thyroid disorders and hypothyroidism over 2925 disease phenotypes in 13 endpoint categories as described in FinnGen ([finngen.gitbook.io/documentation/](https://finngen.gitbook.io/documentation/)).

**Supplemental table 2**

| Primer name             | Sequence (5' > 3')    | Product size (bp) | T <sub>annealing</sub> (°C) |
|-------------------------|-----------------------|-------------------|-----------------------------|
| A-IRS4 <sub>ex1</sub> F | GAAACCAGTGTTTCAGGCGAG | 551               | 60                          |
| A-IRS4 <sub>ex1</sub> R | TGGCACGTATGGGTCATCCT  |                   |                             |
| B-IRS4 <sub>ex1</sub> F | GCTCCAGTAGCCATAGCTCG  | 755               |                             |
| B-IRS4 <sub>ex1</sub> R | AGGTGCTTTTGGAGGACTCG  |                   |                             |

IRS4 primer sequences and annealing temperature used in PCR and Sanger-sequencing.

**Data availability statement**

The VCF-file of the clinical exome dataset from the index case presented in this study can be found in online repository.
